# Supplementary material
Source: PubMed Central journal article supplement (PMC4723846)
Supplement: ijcem0008-20778-f4.pdf [file ijcem0008-20778-f4.pdf]

## Splicing variants of RON

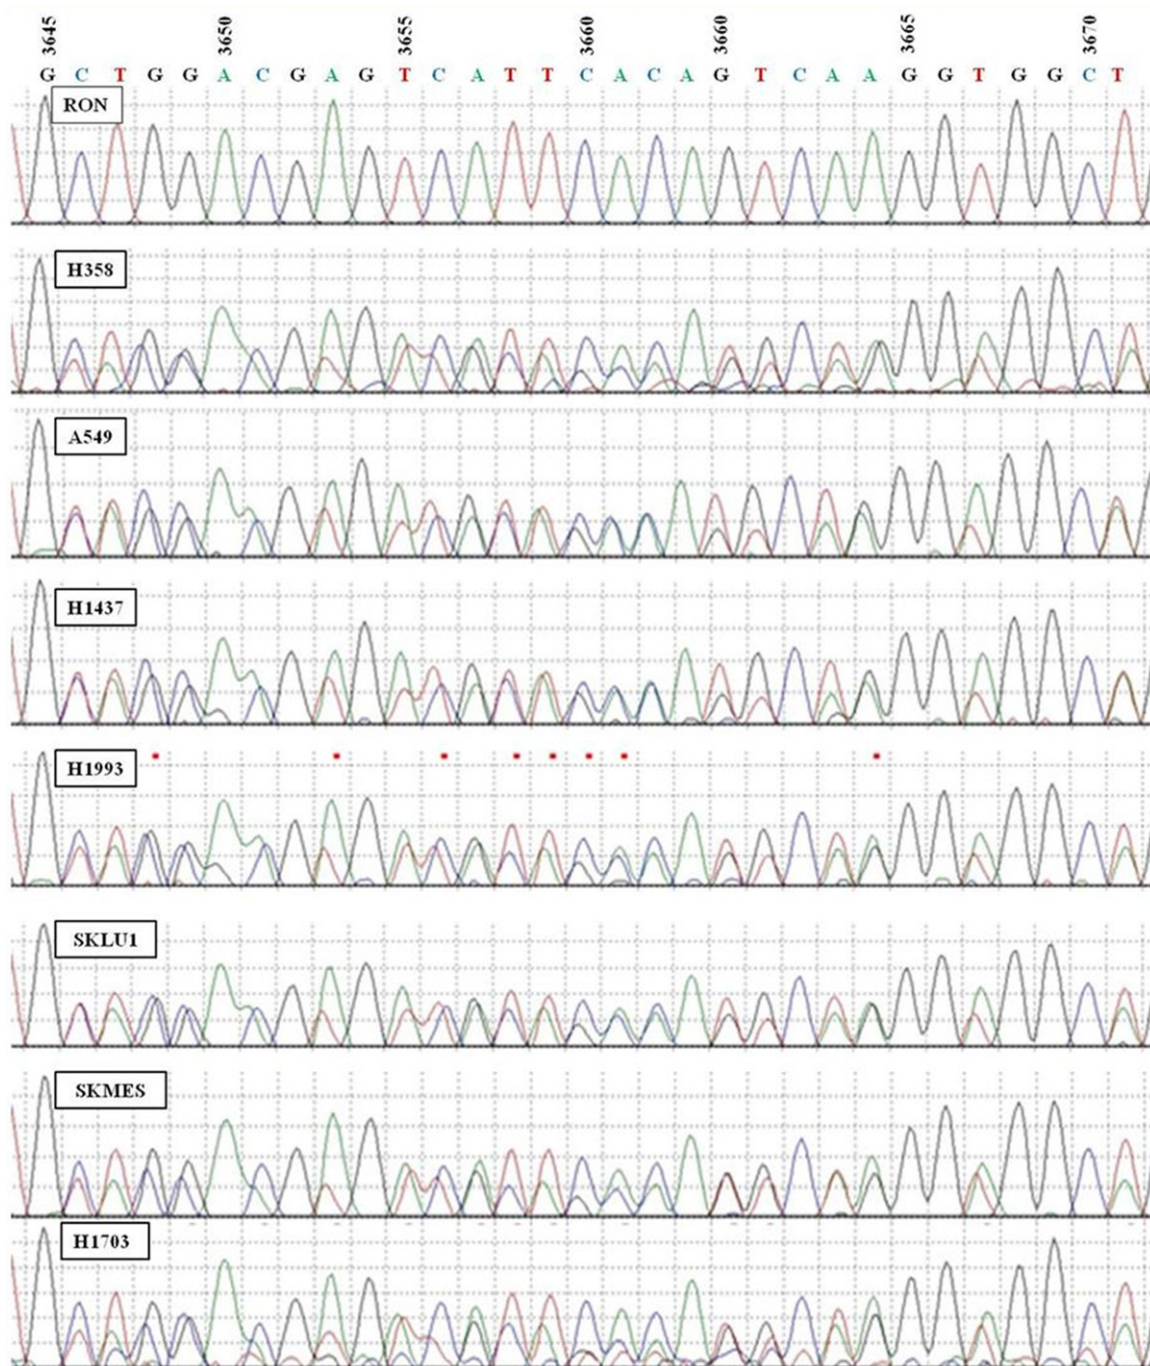

**Supplementary Figure 1.** RON transcript lacking exons 18+19 in seven NSCLC cell lines. Short region of RON cDNA was amplified and sequenced using the forward primer as given in methods. In the sequencing chromatograms of each of the cell lines, overlapping sequence starts from nucleotide 3645 of RON reference sequence. The overlapping sequence corresponds to exon 20, indicating skipping of exons 18 and 19.

## Splicing variants of RON

```

1 atggagctcctcccgcgctgctcagtccttctgttgctgctg
M E L L P P L P Q S F L L L L
46 ctggtgcctgccaagcccgcggcgaggactggcagtgcccg
L L P A K P A A G E D W Q C P
91 cgcaccccctacgcggcctctcgcgactttgacgtgaagtacgtg
R T P Y A A S R D F D V K Y V
136 gtgccagcttctccgcggagcctggtagcaggccatggtgacc
V P S F S A G G L V Q A M V T
181 tacgagggcgacagaaatgagagtgctgtgtttgtagccatacgc
Y E G D R N E S A V F V A I R
226 aatcgctgcatgtgcttggcctgacctgaagtctgtocagagc
N R L H V L G P D L K S V Q S
271 ctggccacgggcccctgctggagaccctggctgccagacgtgtgca
L A T G P A G D P G C Q T C A
316 gcctgtggcccaggaccccacggccctcccggtgacacagacaca
A C G P G P H G P P G D T D T
361 aaggtgctggtgctggatcccgcgctgcctgcgctggtcagttgt
K V L V L D P A L P A L V S C
406 ggctccagcctgcagggccgctgcttctcctgcatgacctagagccc
G S S L Q G R C F L H D L E P
451 caagggacagccgtgcatctggcagcggcagcctgctcttctca
Q G T A V H L A A P A C L F S
496 gccaccataaccggcccgatgactgccccgactgtgtggccagc
A H H N R P D D C P D C V A S
541 ccattgggcaccctgtgtaactgtggttgagcaaggccaggcctcc
P L G T R V T V V E Q G Q A S
586 ttttctacgtggcatcctcactggacgcagccgtggctggcagc
Y F Y V A S S L D A A V A G S
631 ttcagcccacgctcagtgctatcaggcgtctcaaggctgacgcc
F S P R S V S I R R L K A D A
676 tcgggattcgcaccggccttggggcgttgctcagtgctgcccag
S G F A P G F V A L S V L P K
721 catctgtctcctacagtattgaatacgtgcacagcttocacacg
H L V S Y S I E Y V H S F H T
766 ggagccttctgatacttctgactgtacagccggccagcgtgaca
G A F V Y F L T V Q P A S V T
811 gatgatcctagtgccctgcacacacgcctggcacggcttagcggc
D D P S A L H T R L A R L S A
856 actgagccagagttgggtgactatcgggagctggtcctcagctgc
T E P E L G D Y R E L V L D C
901 agatttgctccaaaacgcaggcgcggggggcccagaaggcggga
R F A P K R R R R G A P E G G
946 cagccctaccctgtgctgcaggtggcccactccgctccagtggtg
Q P Y P V L Q V A H S A P V G
991 gcccaacttgccactgagctgagcatcgcggaggccaggaagta
A Q L A T E L S I A E G Q E V
1036 ctatttggggcttttgtgactggcaaggatggtggtcctggcgtg
L F G V F V T G K D G G P G V
1081 ggcccaactctgtcgtctgtgccttcccattgacctgctggac
G P N S V V C A F P I D L L D
1126 aactaattgatgagggtgtggagcgtgttgtgaatccccagtc
T L I D E G V E R C C E S P V
1171 catccaggcctccggcgaggcctcagcttcttccagtcgcccagt
H P G L R R G L D F F Q S P S
1216 ttttgccccaaccgcctggcctggaagccctcagcccaacc
F C P N P P G L E A L S P N T
1261 agctgccgcacttccctctgctggctcagtagcagcttctcagct
S C R H F P L L V S S S F S R
1306 gtggacctattcaatgggctgttgggaccagtagcaggtcactgca
V D L F N G L L G P V Q V T A

```



## Splicing variants of RON

1351 ttgtatgtgacacgccttgacaacgtcacagtggcacacatgggc  
 L Y V T R L D N V T V A H M G  
 1396 acaatggatgggctatcctgcaggtggagctggcaggtcacta  
 T M D G R I L Q V E L V R S L  
 1441 aactacttgctgtatgtgtccaacttctcactgggtgacagtggg  
 N Y L L Y V S N F S L G D S G  
 1486 cagcccggtgcagcgggatgtcagtcgtcttggggaccacactc  
 Q P V Q R D V S R L G D H L L  
 1531 ttgcctctggggaccaggttttccaggtacctatccgagggcct  
 F A S G D Q V F Q V P I R G P  
 1576 ggctgccgccacttctgacctgtgggcttgcttaagggcatgg  
 G C R H F L T C G R C L R A W  
 1621 catttcatgggctgtggctgggtgggaacatgtcggccagcag  
 H F M G C G W C G N M C G Q Q  
 1666 aaggagtgtcctggctcctggcaacaggaccactgccacctaag  
 K E C P G S W Q Q D H C P P K  
 1711 cttactgagttccaccccacagtggacctctaaggggcagtaca  
 L T E F H P H S G P L R G S T  
 1756 aggctgacctgtgtggctccaacttctaccttacccttctggg  
 R L T L C G S N F Y L H P S G  
 1801 ctggtgcctgagggaaacccatcaggtcactgtgggccaagtccc  
 L V P E G T H Q V T V G Q S P  
 1846 tgccggccactgccaaggacagctcaaaactcagaccagtggcc  
 C R P L P K D S S K L R P V P  
 1891 cggaaagactttgtagaggagtttgagtgtgaactggagcccttg  
 R K D F V E E F E C E L E P L  
 1936 ggcaaccaggcagtggggctaccaacgtcagcctcaccgtgact  
 G T Q A V G P T N V S L T V T  
 1981 aacatgccaccgggcaagcacttccgggtagacggcacctccgtg  
 N M P P G K H F R V D G T S V  
 2026 ctgagaggcttctctttcatggagccagtgtgatagcagtgcaa  
 L R G F S F M E P V L I A V Q  
 2071 cccctctttggcccacgggcaggagggcacctgtctcactctttaa  
 P L F G P R A G G T C L T L E  
 2116 ggccagagtctgtctgtagaccagccgggctgtgctgggtcaat  
 G Q S L S V G T S R A V L V N  
 2161 gggactgagtgctgtagcacgggtcagtgaggggcagctttaa  
 G T E C L L A R V S E G Q L L  
 2206 tgtgccacaccccctggggccacgggtggccagtgctccccttagc  
 C A T P P G A T V A S V P L S  
 2251 ctgcaggtggggggtgccaggtacctggttctggaccttccag  
 L Q V G G A Q V P G S W T F Q  
 2296 tacagagaagaccctgtcgtgtaagcatcagcccaactgtggc  
 Y R E D P V V L S I S P N C G  
 2341 tacatcaactcccacatcaccatctgtggccagcatctaacttca  
 Y I N S H I T I C G Q H L T S  
 2386 gcatggcacttagtgctgtcattccatgacgggcttagggcagtg  
 A W H L V L S F H D G L R A V  
 2431 gaaagcaggtgtgagaggcagcttccagagcagcagctgtgccgc  
 E S R C E R Q L P E Q Q L C R  
 2476 cttcctgaatatgtgggtccgagaccccagggtgggtggcaggg  
 L P E Y V V R D P Q G W V A G  
 2521 aatctgagtgccccgaggggatggagctgctggctttacactgcct  
 N L S A R G D G A A G F T L P  
 2566 ggctttcgcttctacccccacccatccaccagtgccaaccta  
 G F R F L P P P H P P S A N L  
 2611 gttccactgaagcctgaggagcatgccattaagtttgagtatatt  
 V P L K P E E H A I K F E Y I  
 2656 gggctgggctgtggctgactgtgtgggtatcaacgtgaccgtg  
 G L G A V A D C V G I N V T V  
 2701 ggtggtgagagctgccagcacgagttccgggggacatggttgtc  
 G G E S C Q H E F R G D M V V

## Splicing variants of RON

2746 tgcacctgccccatccctgcagcttggccaggatggtgcccc  
 C P L P P S L Q L G Q D G A P  
 2791 ttgcaggctctgcgtagatggtgaatgtcatatcctgggtagagt  
 L Q V C V D G E C H I L G R V  
 2836 gtgcgccaggccagatggggtcccacagagcacgctccttgg  
 V R P G P D G V P Q S T L L G  
 2881 atcctgctgcctttgctgctgcttgggctgcaactggcgactgca  
 I L L P L L L L V A A L A T A  
 2926 ctggctctcagctactggtggcgagggaagcagctagttcttct  
 L V F S Y W W R R K Q L V L P  
 2971 cccaacctgaatgacctggcatccctggaccagactgctggagcc  
 P N L N D L A S L D Q T A G A  
 3016 acacctgcctattctgtactcgggctctgactacagaagtggc  
 T P L P I L Y S G S D Y R S G  
 3061 cttgcaactccctgccattgatggtctggattccaccacttgtgtc  
 L A L P A I D G L D S T T C V  
 3106 catggagcatccttctccgatagtgaagatgaatcctgtgtgcca  
 H G A S F S D S E D E S C V P  
 3151 ctgctgcggaagagtccatccagctaagggacctggactctgcg  
 L L R K E S I Q L R D L D S A  
 3196 ctcttggctgaggtcaaggatgtgctgattccccatgagcgggtg  
 L L A E V K D V L I P H E R V  
 3241 gtcaccacagtgaccgagtcattggcaaaggccactttggagtt  
 V T H S D R V I G K G H F G V  
 3286 gtctaccacggagaatacatagaccaggcccagaatcgaatccaa  
 V Y H G E Y I D Q A Q N R I Q  
 3331 tgtgccatcaagtcactaagtcgcatcacagagatgcagcaggtg  
 C A I K S L S R I T E M Q Q V  
 3376 gaggccttctgagagaggggctgctcatgctggcctgaaccac  
 E A F L R E G L L M R G L N H  
 3421 ccgaatgtgctggtctcattgggtatcatgttgcacctgagggc  
 P N V L A L I G I M L P P E G  
 3466 ctgccccatgtgctgctgccctatatgtgccacggtgacctgctc  
 L P H V L L P Y M C H G D L L  
 3511 cagttcatccgctcacctcagcgggaacccacogtgaaggacctc  
 Q F I R S P Q R N P T V K D L  
 3556 atcagctttggcctgcaggtagcccggcagtgagtagctggca  
 I S F G L Q V A R G M E Y L A  
 3601 gagcagaagtttgtgcacagggacctggctgctgagcgaactgca  
 E Q K F V H R D L A A R N C M  
 3646 ctggacgagtcattcacagtcagggtggctgactttggtttggcc  
 L D E S F T V K V A D F G L A  
 3691 cggacatcctggacagggagtactatagtgttcaacagcatcgc  
 R D I L D R E Y Y S V Q Q H R  
 3736 cacgctcgcctacctgtgaagtggatggcgtggagagcctgcag  
 H A R L P V K W M A L E S L Q  
 3781 acctatagatttaccaccaagtctgatgtgtggtcatttgggtgtg  
 T Y R F T T K S D V W S F G V  
 3826 ctgctgtgggaactgctgacacgggggtgccccaccataaccgccac  
 L L W E L L T R G A P P Y R H  
 3871 attgacccttttgaccttaccacttctcggcccagggtcggcgc  
 I D P F D L T H F L A Q G R R  
 3916 ctgccccagcctgagtattgcctgattctctgtaccaagtgatg  
 L P Q P E Y C P D S L Y Q V M  
 3961 cagcaatgctgggaggcagaccagcagtgcgaccacaccttcaga  
 Q Q C W E A D P A V R P T F R  
 4006 gtactagtgggggaggtggagcagatagtgtctgcaactgcttggg  
 V L V G E V E Q I V S A L L G  
 4051 gaccattatgtgcagctgccagcaacctacatgaacttgggcccc  
 D H Y V Q L P A T Y M N L G P  
 4096 agcacctcgcatgagatgaatgtgctccagaacagccgagttc  
 S T S H E M N V R P E Q P Q F

## Splicing variants of RON

```
4141 tcaccatgccaggggaatgtacgccggccccggccactctcagag  
    S P M P G N V R R P R P L S E  
4186 cctcctcggcccacttga 4203  
    P P R P T *
```

**Supplementary Figure 2.** Complete RON coding reference sequence with exons 18 and 19 highlighted in green and yellow, respectively.
